# Supplementary material for: The SARS-CoV-2 Spike protein has a broad tropism for mammalian ACE2 proteins
Source: PubMed Central journal article supplement (PMC7751883; doi:10.1371/journal.pbio.3001016), 2020-12-21

**Figure 1F;  
Uncropped  
western blots**

150 kDa  
100 kDa  
75 kDa

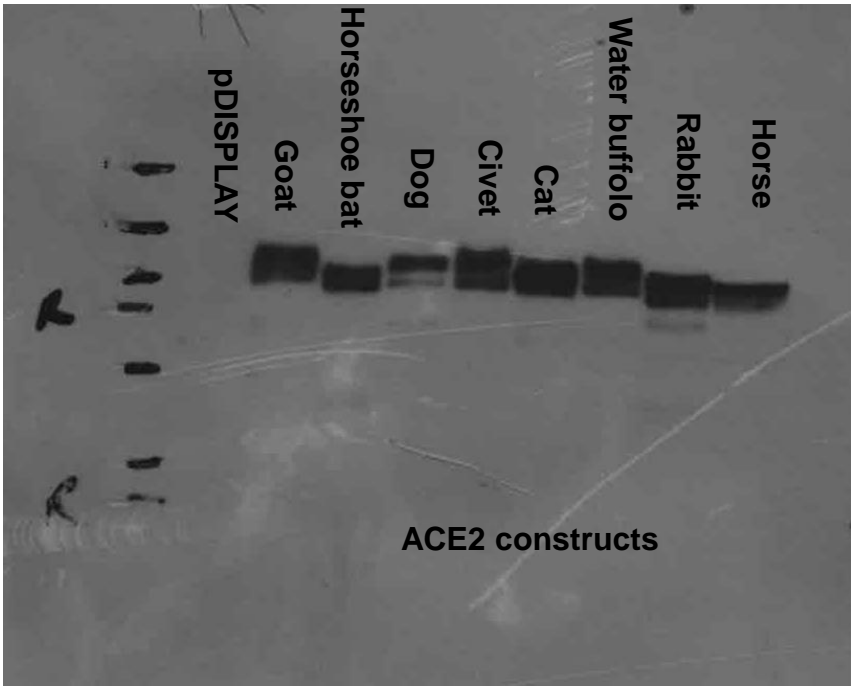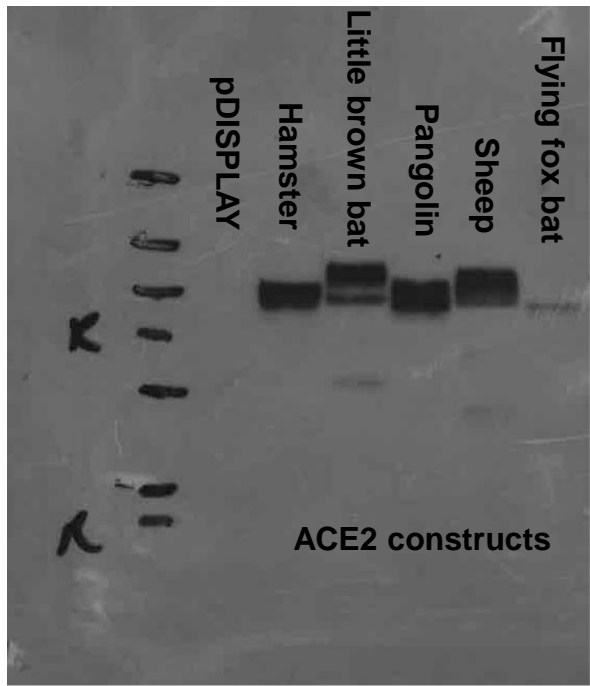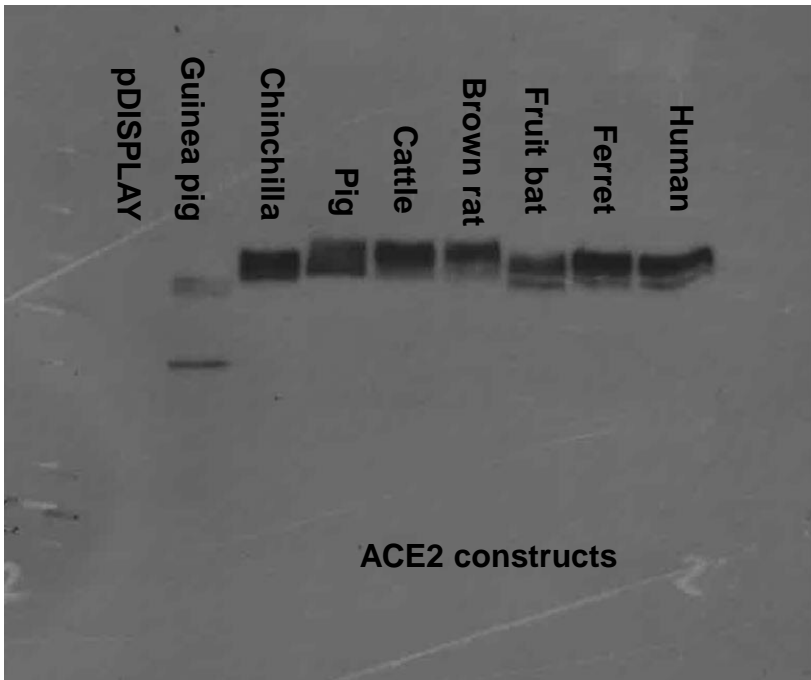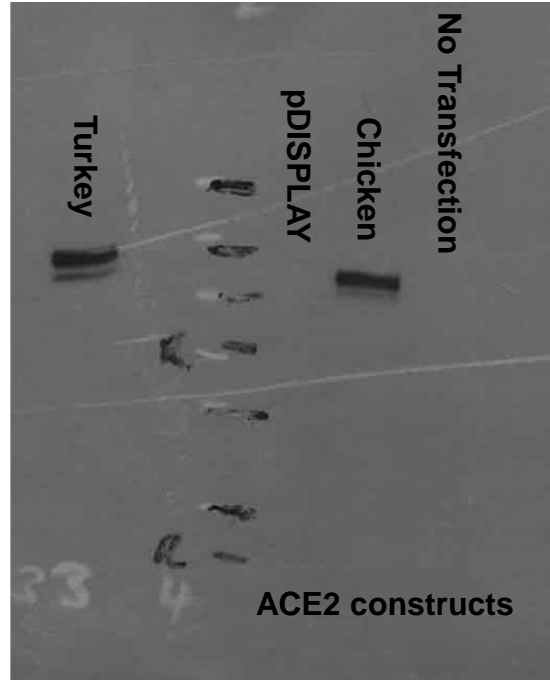

**Figure 4E;  
Uncropped  
western blots**

**Anti-Flag blot  
(Spike)**

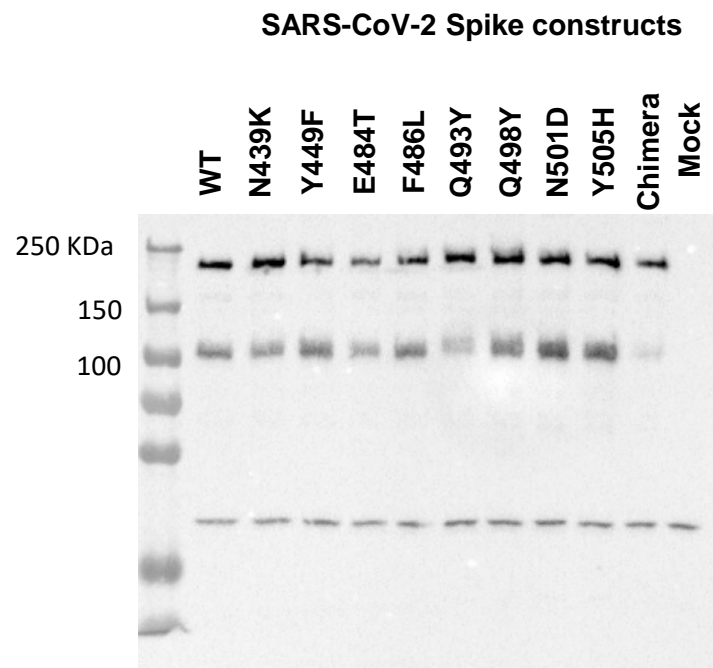

**Anti-  
GAPDH  
blot**

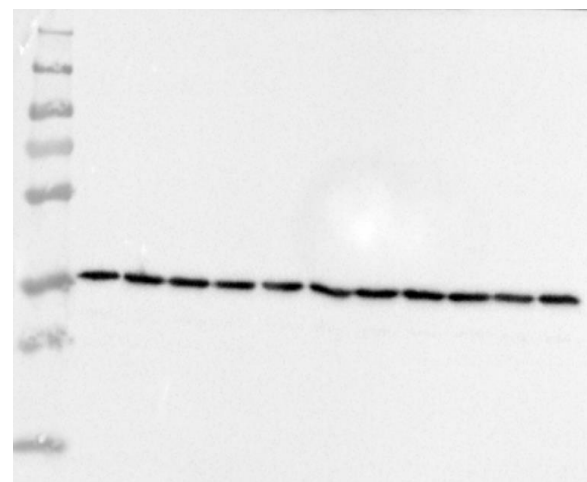

**RATG13 Spike constructs**

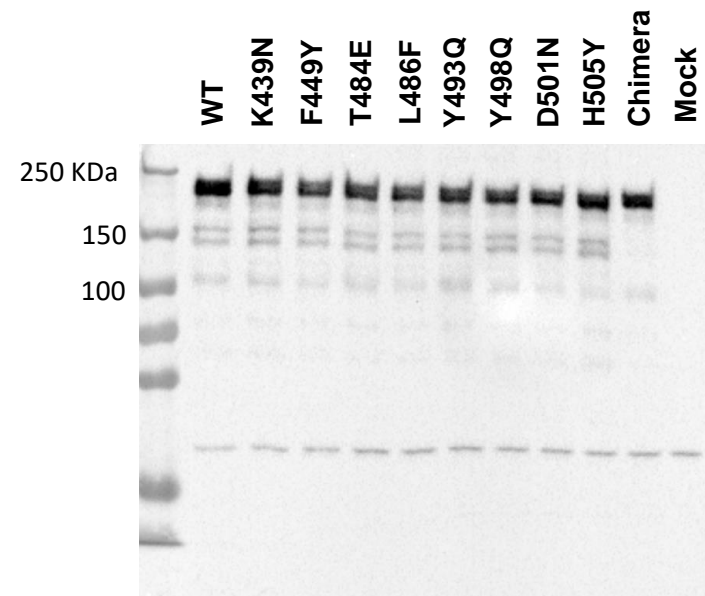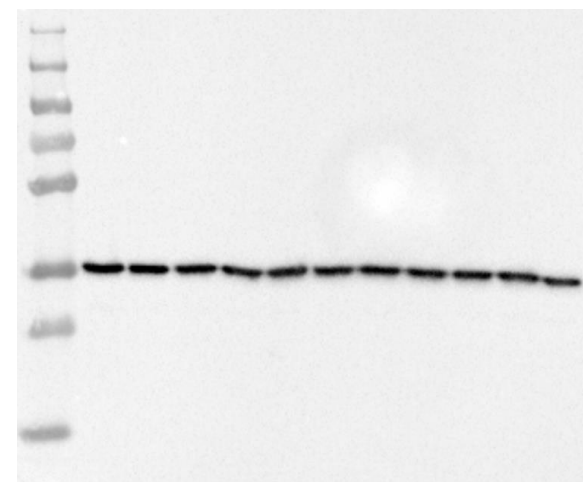

**Supplemental  
Figure 6B;  
Uncropped  
western blot**

150 kDa  
100 kDa  
75 kDa

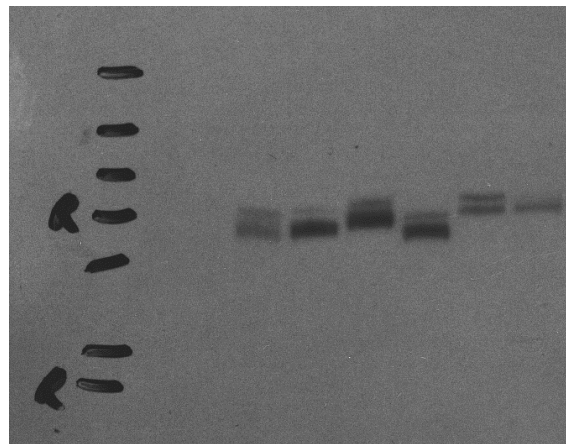

BHK + pDISPLAY  
BHK pig ACE2  
BHK human ACE2  
BHK rabbit ACE2  
BHK chicken ACE2  
BHK horseshoe bat ACE2  
BHK hamster ACE2

**Supplemental  
Figure 7B;  
Uncropped  
western blot**

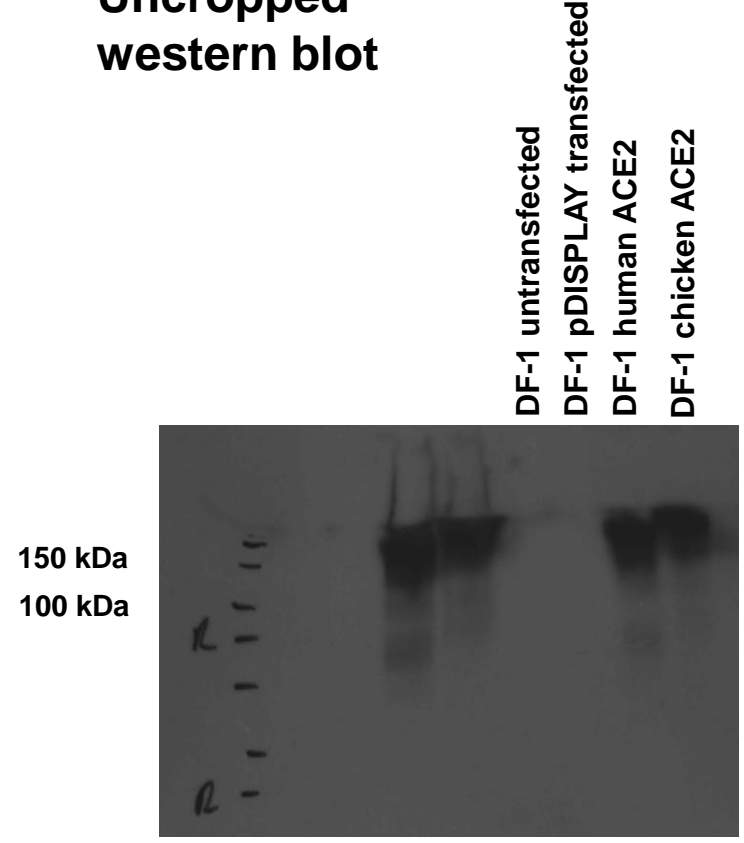

Supplement: pbio.3001016.s015.pdf [file pbio.3001016.s015.pdf]
